# Supplementary material
Source: Springer Nature journal article supplement (https://www.springermedizin.de/resource/supplementary/13034_2009_95_MOESM2_ESM.pdf/9652306)
Supplement: MOESM2 [file 9652306]

Subjects Screened  
N = 194

Screening Failures  
N = 23

Subjects Enrolled  
into Open-Label  
Dose-Optimization  
N = 171

Subjects Withdrawn  
N = 21

Subjects Completed  
N = 150

Adverse Event (3)  
Protocol Violation (2)  
Withdrew Consent (5)  
Lost to Follow-up (4)  
Application Site Reactions (4)  
Lack of Efficacy (2)  
Investigator Decision (1)
